# Supplementary material for: An Integrative Analysis of Nasopharyngeal Carcinoma Genomes Unraveled Unique Processes Driving a Viral-Positive Cancer
Source: Cancers (Basel). 2023 Feb 15;15(4):1243. doi: 10.3390/cancers15041243 (PMC9953764; doi:10.3390/cancers15041243)
Supplement: Supplementary file 1 [file cancers-15-01243-s001.zip › TableS1.xlsx]

## Sheet: Table1
Table S1. Reported drivers with explicit statistical evidence.
Driver	Lin et al, (2014)	Li et al, (2017)	Zheng et al, (2016)	Ding et al, (2021)
TP53	ALK	CYLD	NFKBIA	TP53
CYLD	APOBEC3B	NFKBIA	TP53	CYLD
NFKBIA	ARID1A	TP53		KMT2C
TRAF3	ARID2	HLA-A		FBXW7
BAP1	ATAD2	MED12L		NOTCH2
CBFB	ATG13	NRAS		NFKBIA
FBXW7	ATG7	TRAF3		TRAF3
NLRC5	ATR			PTEN
ATG14	ATXN1L			MTOR
NRAS	BAP1			PIK3C2B
ARHGEF15	BCL9			PIK3CG
C2orf78	BRCA2			KMT2B
TGFBR2	BRD4			ARID1A
TRAF2	BUB1			NF1
DCDC1	CARD9			ATM
EBLN2	CASP8			BAP1
RSAD2	CCL5			SYNE1
FAM104B	CDH23			FAT2
WBP1	CELSR3
ARID1B	CERK
HERC1	CHD6
KMT2D	CLTB
PTEN	CREB1
SOGA1	CTTN
PIK3CA	DNMT3B
FGFR3	DOCK10
CUL1	DOCK2
SMAD4	DROSHA
ERBB2	DST
EP300	ERBB2
ARID1A	ERBB3
CREBBP	ERCC6L
KDM6A	FAT1
KRAS	FAT2
MAP3K1	FES
ARHGAP5	FGFR2
STK11	FMO3
ITGA10	GNAS
	GNB5
	GTF3C1
	HECTD1
	HERC1
	HSPD1
	IRAK3
	KDM1A
	KDM4A
	KDM4C
	KDM4E
	KDM5A
	KDM5B
	KIAA0430
	KIF4A
	KIT
	KRAS
	KRT4
	LARS2
	LRP1
	LRRC41
	LRRK1
	MAN1B1
	MAP2K2
	MAP3K15
	MAP3K4
	MAP3K7
	MAPKAPK5
	MCM2
	MCM3AP
	MCM4
	MED13
	MEGF8
	MET
	MLL2
	MLL3
	MLL4
	MRPL2
	MTOR
	NCOR2
	NEDD4
	NFKB1
	NOTCH1
	NOTCH2
	NOTCH3
	NPRL2
	NRAS
	NTRK2
	PHF3
	PHIP
	PIGV
	PIK3C2B
	PIK3C2G
	PIK3CA
	PIK3CG
	PKM2
	POLG
	POLR3C
	PRG4
	PRKAB1
	PSMA6
	PSMD4
	PTCH1
	PTPRS
	PTPRT
	RAD21
	ROBO1
	RPS6KA2
	RRM1
	SAMD4A
	SAMD9
	SEMA6D
	SETD2
	SETDB1
	SIRT1
	SMAD3
	SMARCA5
	SMARCC1
	SMARCC2
	SMG1
	SMURF2
	SPTBN1
	STXBP6
	SWT1
	SYNE1
	TET1
	TET2
	TET3
	THBS2
	TNKS
	TP53
	TSHZ3
	UBQLN4
	USE1
	USP34
	WDFY3
	ZNF462
