# Supplementary material for: An Integrative Analysis of Nasopharyngeal Carcinoma Genomes Unraveled Unique Processes Driving a Viral-Positive Cancer
Source: Cancers (Basel). 2023 Feb 15;15(4):1243. doi: 10.3390/cancers15041243 (PMC9953764; doi:10.3390/cancers15041243)
Supplement: Supplementary file 1 [file cancers-15-01243-s001.zip › TableS2.xlsx]

## Sheet: TableS2
Table S2: Clinical information of the cohort.
Samples	Dataset	Gender	Age	Stage	EBV	Smoking	End.time.event	Followup.time(Month)
HKNPC-002T	Li et al. 2017	Male	49	II	Yes	Yes	0	102.767
HKNPC-003T	Li et al. 2017	Male	74	IV	Yes	Yes	1	12.8667
HKNPC-004T	Li et al. 2017	Male	41	III	Yes	Yes	0	66.6333
HKNPC-005T	Li et al. 2017	Male	70	III	Yes	Yes	1	50.7333
HKNPC-006T	Li et al. 2017	Female	70	II	Yes	NA	0	65.3333
HKNPC-007T	Li et al. 2017	Male	54	III	Yes	Yes	0	90.4667
HKNPC-010T	Li et al. 2017	Male	56	IV	Yes	Yes	1	46.4
HKNPC-011T	Li et al. 2017	Male	52	III	Yes	Yes	1	56.5667
HKNPC-012T	Li et al. 2017	Female	51	IV	Yes	No	1	39.1667
HKNPC-012T2	Li et al. 2017	Female	51	IV	Yes	No	1	39.1667
HKNPC-013T	Li et al. 2017	Female	71	II	Yes	No	1	40.1667
HKNPC-014T	Li et al. 2017	Male	41	III	Yes	No	1	43.5667
HKNPC-015T	Li et al. 2017	Male	51	IV	Yes	Yes	1	30.6667
HKNPC-016T	Li et al. 2017	Male	55	III	Yes	Yes	1	23.7
HKNPC-017T	Li et al. 2017	Male	45	II	Yes	No	0	103.5
HKNPC-019T	Li et al. 2017	Male	54	II	Yes	Yes	1	39.4333
HKNPC-020T	Li et al. 2017	Male	48	IV	Yes	Yes	1	13.8667
HKNPC-021T	Li et al. 2017	Male	53	IV	Yes	Yes	1	14.8667
HKNPC-023T	Li et al. 2017	Male	45	II	Yes	Yes	1	41.4333
HKNPC-024T	Li et al. 2017	Female	50	III	Yes	No	0	98.8667
HKNPC-026T	Li et al. 2017	Male	27	IV	Yes	Yes	0	99.9333
HKNPC-027T	Li et al. 2017	Male	58	IV	Yes	Yes	0	85.6333
HKNPC-029T	Li et al. 2017	Male	69	II	Yes	Yes	1	36.1
HKNPC-030T	Li et al. 2017	Male	62	IV	Yes	No	0	83.3667
HKNPC-031T	Li et al. 2017	Male	47	III	Yes	Yes	0	114.167
HKNPC-032T	Li et al. 2017	Male	74	II	Yes	No	1	65.9667
HKNPC-033T	Li et al. 2017	Male	48	III	Yes	No	1	18
HKNPC-034T	Li et al. 2017	Male	36	IV	Yes	Yes	1	50.4667
HKNPC-035T	Li et al. 2017	Male	60	II	Yes	Yes	0	76.5667
HKNPC-036T	Li et al. 2017	Male	73	III	Yes	Yes	1	22.2333
HKNPC-037T	Li et al. 2017	Male	54	IV	Yes	Yes	1	55.3333
HKNPC-038T	Li et al. 2017	Male	80	IV	Yes	Yes	1	12.0667
HKNPC-039T	Li et al. 2017	Male	60	IV	Yes	Yes	1	56.1333
HKNPC-040T	Li et al. 2017	Male	42	III	Yes	Yes	0	116.7
HKNPC-041T	Li et al. 2017	Female	48	IV	Yes	No	0	87.9333
HKNPC-042T	Li et al. 2017	Female	34	III	Yes	No	0	86.3333
HKNPC-043T	Li et al. 2017	Male	62	IV	Yes	Yes	0	96.1333
HKNPC-044T	Li et al. 2017	Female	54	III	Yes	No	0	95.2667
HKNPC-045T	Li et al. 2017	Female	45	III	Yes	No	0	74.3333
HKNPC-046T	Li et al. 2017	Male	33	I	Yes	No	0	84.9667
HKNPC-047T	Li et al. 2017	Male	76	III	Yes	Yes	1	61.8667
HKNPC-048T	Li et al. 2017	Male	35	IV	Yes	No	0	95.7667
HKNPC-051T	Li et al. 2017	Male	47	IV	Yes	No	0	78.2
HKNPC-052T	Li et al. 2017	Female	41	III	Yes	No	0	88.3667
HKNPC-053T	Li et al. 2017	Female	55	IV	Yes	No	1	11.3
HKNPC-055T	Li et al. 2017	Male	48	III	Yes	Yes	0	79.8
HKNPC-056T	Li et al. 2017	Female	40	III	Yes	No	0	13.7667
HKNPC-057T	Li et al. 2017	Male	23	III	Yes	No	0	12.6
HKNPC-058T	Li et al. 2017	Male	35	IV	Yes	Yes	0	13.5333
HKNPC-059T	Li et al. 2017	Female	23	II	Yes	No	0	76.8667
HKNPC-061T	Li et al. 2017	Female	67	II	Yes	No	0	97.1
HKNPC-062T	Li et al. 2017	Male	36	III	Yes	No	0	82.8667
HKNPC-063T	Li et al. 2017	Female	37	IV	Yes	No	0	45.7333
HKNPC-064T	Li et al. 2017	Male	50	III	Yes	No	0	92.9667
HKNPC-065T	Li et al. 2017	Male	53	IV	Yes	No	0	91.3667
HKNPC-067T	Li et al. 2017	Male	41	III	Yes	No	0	88.2
HKNPC-069T	Li et al. 2017	Male	49	IV	Yes	Yes	0	74.2667
HKNPC-070T	Li et al. 2017	Female	49	II	Yes	No	0	99.1
HKNPC-071T	Li et al. 2017	Male	44	II	Yes	Yes	0	78.4333
HKNPC-072T	Li et al. 2017	Male	43	IV	Yes	Yes	0	69.0667
HKNPC-075T	Li et al. 2017	Male	49	IV	Yes	No	0	7.66667
HKNPC-076T	Li et al. 2017	Female	38	IV	Yes	No	0	8.33333
HKNPC-078T	Li et al. 2017	Male	37	III	Yes	Yes	0	8.03333
HKNPC-079T	Li et al. 2017	Male	56	III	Yes	Yes	0	2.23333
HKNPC-082T	Li et al. 2017	Male	43	III	Yes	No	0	94.1333
HKNPC-084T	Li et al. 2017	Male	55	II	Yes	NA	0	19.3
HKNPC-085T	Li et al. 2017	Male	54	I	Yes	No	0	21.4333
HKNPC-086T	Li et al. 2017	Male	61	I	Yes	No	0	18.0333
HKNPC-087T	Li et al. 2017	Male	74	I	Yes	Yes	0	14.6333
HKNPC-089T	Li et al. 2017	Female	43	II	Yes	No	0	10.9333
HKNPC-090T	Li et al. 2017	Female	70	III	Yes	No	0	9.6
HKNPC-097T	Li et al. 2017	Male	51	II	Yes	No	0	96.3333
HKNPC-101T	Li et al. 2017	Male	60	III	Yes	No	0	8.16667
HKNPC-102T	Li et al. 2017	Male	47	III	Yes	Yes	0	12.7667
HKNPC-103T	Li et al. 2017	Male	40	I	Yes	No	0	12.1333
HKNPC-105T	Li et al. 2017	Male	57	III	Yes	No	0	19.1
HKNPC-107T	Li et al. 2017	Male	59	I	Yes	Yes	0	18.9667
IDT101_why101_combined	Wang et al. 2019	Male	49	IV	NA	No	0	26
IDT103_why103_combined	Wang et al. 2019	Female	48	III	NA	No	0	23
IDT105_why105_combined	Wang et al. 2019	Female	55	III	NA	Yes	0	18
IDT107_why107_combined	Wang et al. 2019	Male	64	III	NA	No	1	47
IDT109_why109_combined	Wang et al. 2019	Male	47	IV	NA	No	1	52
IDT11_why11_combined	Wang et al. 2019	Male	41	III	NA	Yes	0	53
IDT111_why111_combined	Wang et al. 2019	Female	48	III	NA	No	0	48
IDT117_why117_combined	Wang et al. 2019	Male	46	IV	NA	No	0	49
IDT119_why119_combined	Wang et al. 2019	Male	56	III	NA	Yes	0	58
IDT121_why121_combined	Wang et al. 2019	Female	43	III	NA	No	0	48
IDT123_why123_combined	Wang et al. 2019	Male	71	III	NA	NA	1	13
IDT127_why127_combined	Wang et al. 2019	Male	44	III	NA	NA	0	38
IDT129_why129_combined	Wang et al. 2019	Female	69	IV	NA	Yes	1	7
IDT13_why13_combined	Wang et al. 2019	Male	59	III	NA	Yes	0	47
IDT131_why131_combined	Wang et al. 2019	Female	47	IV	NA	No	0	50
IDT133_why133_combined	Wang et al. 2019	Female	28	III	NA	No	0	50
IDT135_why135_combined	Wang et al. 2019	Male	54	III	NA	Yes	0	53
IDT137_why137_combined	Wang et al. 2019	Male	27	III	NA	NA	0	43
IDT141_why141_combined	Wang et al. 2019	Male	41	III	NA	NA	0	21
IDT145_why145_combined	Wang et al. 2019	Male	36	III	NA	Yes	0	39
IDT147_why147_combined	Wang et al. 2019	Male	63	IV	NA	No	0	56
IDT149_why149_combined	Wang et al. 2019	Female	57	IV	NA	No	0	45
IDT15_why15_combined	Wang et al. 2019	Male	36	III	NA	Yes	0	50
IDT151_why151_combined	Wang et al. 2019	Female	60	III	NA	No	0	53
IDT153_why153_combined	Wang et al. 2019	Male	19	III	NA	No	0	52
IDT155_why155_combined	Wang et al. 2019	Male	35	III	NA	Yes	0	20
IDT167_why167_combined	Wang et al. 2019	Female	46	III	NA	No	0	29
IDT169_why169_combined	Wang et al. 2019	Male	49	III	NA	No	0	51
IDT17_why17_combined	Wang et al. 2019	Male	41	IV	NA	No	0	55
IDT175_why175_combined	Wang et al. 2019	Male	58	IV	NA	Yes	0	51
IDT19_why19_combined	Wang et al. 2019	Male	57	III	NA	Yes	0	55
IDT21_why21_combined	Wang et al. 2019	Male	41	III	NA	Yes	0	51
IDT23_why23_combined	Wang et al. 2019	Male	48	IV	NA	Yes	0	27
IDT25_why25_combined	Wang et al. 2019	Male	62	IV	NA	NA	1	42
IDT27_why27_combined	Wang et al. 2019	Male	56	IV	NA	Yes	0	33
IDT29_why29_combined	Wang et al. 2019	Male	63	IV	NA	No	0	63
IDT31_why31_combined	Wang et al. 2019	Male	37	III	NA	No	0	58
IDT33_why33_combined	Wang et al. 2019	Male	64	IV	NA	Yes	0	45
IDT35_why35_combined	Wang et al. 2019	Female	26	III	NA	NA	0	55
IDT37_why37_combined	Wang et al. 2019	Male	57	III	NA	No	1	31
IDT39_why39_combined	Wang et al. 2019	Female	57	IV	NA	No	0	56
IDT41_why41_combined	Wang et al. 2019	Female	36	III	NA	No	0	52
IDT43_why43_combined	Wang et al. 2019	Male	48	III	NA	Yes	0	60
IDT45_why45_combined	Wang et al. 2019	Male	61	II	NA	NA	1	22
IDT47_why47_combined	Wang et al. 2019	Male	46	III	NA	No	1	30
IDT49_why49_combined	Wang et al. 2019	Male	51	IV	NA	Yes	0	28
IDT51_why51_combined	Wang et al. 2019	Male	49	IV	NA	Yes	0	32
IDT53_why53_combined	Wang et al. 2019	Male	46	III	NA	No	0	94
IDT55_why55_combined	Wang et al. 2019	Male	48	II	NA	No	0	48
IDT59_why59_combined	Wang et al. 2019	Male	71	IV	NA	No	1	50
IDT61_why61_combined	Wang et al. 2019	Female	44	III	NA	No	0	52
IDT63_why63_combined	Wang et al. 2019	Male	47	III	NA	No	0	42
IDT65_why65_combined	Wang et al. 2019	Male	36	IV	NA	No	0	35
IDT69_why69_combined	Wang et al. 2019	Male	42	III	NA	No	0	60
IDT71_why71_combined	Wang et al. 2019	Male	64	III	NA	No	0	63
IDT73_why73_combined	Wang et al. 2019	Male	53	III	NA	Yes	0	52
IDT75_why75_combined	Wang et al. 2019	Female	44	II	NA	No	0	48
IDT77_why77_combined	Wang et al. 2019	Male	43	III	NA	No	0	54
IDT79_why79_combined	Wang et al. 2019	Male	35	IV	NA	NA	0	69
IDT81_why81_combined	Wang et al. 2019	Male	30	III	NA	No	1	36
IDT83_why83_combined	Wang et al. 2019	Male	46	II	NA	No	0	50
IDT85_why85_combined	Wang et al. 2019	Male	40	IV	NA	No	0	54
IDT87_why87_combined	Wang et al. 2019	Male	35	IV	NA	Yes	0	67
IDT89_why89_combined	Wang et al. 2019	Male	52	II	NA	No	0	23
IDT9_why9_combined	Wang et al. 2019	Female	41	IV	NA	No	0	31
IDT93_why93_combined	Wang et al. 2019	Male	37	III	NA	No	0	55
IDT95_why95_combined	Wang et al. 2019	Male	47	IV	NA	Yes	0	57
IDT97_why97_combined	Wang et al. 2019	Male	58	IV	NA	Yes	0	29
IDT99_why99_combined	Wang et al. 2019	Female	44	III	NA	No	0	46
NPC015D-T	Lin et al. 2014	Male	53	IV	NA	Yes	0	62
NPC025D-T	Lin et al. 2014	Female	47	II	NA	No	0	59
NPC051D-T	Lin et al. 2014	Male	62	IV	NA	NA	0	2
NPC105D-T	Lin et al. 2014	Male	47	IV	NA	Yes	0	40
NPC10D-T	Lin et al. 2014	Male	54	IV	NA	Yes	0	13
NPC10F-T	Lin et al. 2014	Female	37	IV	NA	No	0	55
NPC115D-T	Lin et al. 2014	Male	65	IV	NA	No	0	34
NPC11D-T	Lin et al. 2014	Male	42	II	NA	No	0	9
NPC11F-T	Lin et al. 2014	Male	59	II	NA	Yes	0	24
NPC12F-T	Lin et al. 2014	Female	57	II	NA	No	0	47
NPC13F-T	Lin et al. 2014	Male	60	II	NA	No	0	13
NPC14F-T	Lin et al. 2014	Male	59	I	NA	No	1	30
NPC15F-T	Lin et al. 2014	Male	61	III	NA	No	0	50
NPC16F-T	Lin et al. 2014	Male	63	IV	NA	No	0	47
NPC17F-T	Lin et al. 2014	Male	41	II	NA	No	0	50
NPC19F-T	Lin et al. 2014	Male	56	III	NA	No	0	44
NPC1F-T	Lin et al. 2014	Male	40	IV	NA	No	1	45
NPC21F-T	Lin et al. 2014	Male	51	III	NA	Yes	1	21
NPC22F-T	Lin et al. 2014	Male	45	IV	NA	No	0	40
NPC23F-T	Lin et al. 2014	Male	54	IV	NA	No	0	47
NPC25F-T	Lin et al. 2014	Male	50	III	NA	No	1	16
NPC26F-T	Lin et al. 2014	Male	52	IV	NA	Yes	0	22
NPC27F-T	Lin et al. 2014	Male	56	III	NA	Yes	0	28
NPC28F-T	Lin et al. 2014	Male	58	III	NA	No	0	35
NPC29F-T	Lin et al. 2014	Male	49	IV	NA	Yes	1	24
NPC2F-T	Lin et al. 2014	Male	48	IV	NA	No	1	21
NPC30F-T	Lin et al. 2014	Male	46	III	NA	Yes	0	35
NPC33F-T	Lin et al. 2014	Male	53	III	NA	Yes	0	6
NPC34F-T	Lin et al. 2014	Female	45	IV	NA	No	0	27
NPC35F-T	Lin et al. 2014	Male	63	III	NA	Yes	0	2
NPC37F-T	Lin et al. 2014	Male	72	II	NA	Yes	0	16
NPC38F-T	Lin et al. 2014	Female	58	III	NA	No	0	26
NPC39F-T	Lin et al. 2014	Male	54	II	NA	No	0	27
NPC3D-T	Lin et al. 2014	Male	54	IV	NA	Yes	0	NA
NPC3F-T	Lin et al. 2014	Female	52	NA	NA	Yes	0	NA
NPC40F-T	Lin et al. 2014	Male	57	III	NA	Yes	0	25
NPC41F-T	Lin et al. 2014	Male	44	IV	NA	No	0	22
NPC4F-T	Lin et al. 2014	Male	37	IV	NA	No	1	5
NPC5F-T	Lin et al. 2014	Female	64	III	NA	No	0	58
NPC6F-T	Lin et al. 2014	Female	36	III	NA	No	1	23
NPC7D-T	Lin et al. 2014	Male	41	IV	NA	No	0	21
NPC8F-T	Lin et al. 2014	Male	80	II	NA	Yes	0	17
NPC9F-T	Lin et al. 2014	Male	36	III	NA	Yes	0	53
P-04-12313T	Li et al. 2017	Male	62	III	Yes	Yes	1	NA
PT00012_T	Zhang et al. 2017	Male	37	II	Yes	Yes	0	81.4333
PT00014_T	Zhang et al. 2017	Male	41	III	Yes	Yes	1	32.8667
PT00019-2_T	Zhang et al. 2017	Female	56	III	Yes	Yes	0	81.5667
PT00020_T	Zhang et al. 2017	Female	47	III	Yes	Yes	0	80.4333
PT00034-2_T	Zhang et al. 2017	Male	28	III	Yes	Yes	0	57.9667
PT00048_T	Zhang et al. 2017	Male	42	III	Yes	Yes	1	21.8
PT00055_T	Zhang et al. 2017	Female	50	I	Yes	Yes	1	64.2
PT00061_T	Zhang et al. 2017	Male	34	I	Yes	Yes	0	79.1
PT00065_T	Zhang et al. 2017	Male	49	III	Yes	Yes	0	80.2667
PT00069_T	Zhang et al. 2017	Female	73	III	Yes	Yes	1	48.9
PT00070_T	Zhang et al. 2017	Male	52	III	Yes	Yes	1	50.5333
PT00071_T	Zhang et al. 2017	Male	67	I	Yes	Yes	1	29.6
PT00075_T	Zhang et al. 2017	Male	46	III	Yes	Yes	0	78.7667
PT00078_T	Zhang et al. 2017	Male	48	III	Yes	Yes	1	42.8
PT00079_T	Zhang et al. 2017	Male	51	III	Yes	Yes	1	15.5333
PT00097_T	Zhang et al. 2017	Male	64	III	Yes	NA	1	4.96667
PT00099_T	Zhang et al. 2017	Female	46	III	Yes	NA	0	76.7333
PT00100_T	Zhang et al. 2017	Male	45	III	Yes	NA	0	76.3
PT00151_T	Zhang et al. 2017	Male	55	III	Yes	NA	0	27.3
PT00152_T	Zhang et al. 2017	Male	49	III	Yes	NA	0	70.2
PT00233_T	Zhang et al. 2017	Male	46	III	No	NA	0	65.2667
PT00234_T	Zhang et al. 2017	Female	50	III	Yes	NA	0	69.4333
PT00260_T	Zhang et al. 2017	Male	61	III	Yes	Yes	0	38
PT00294_T	Zhang et al. 2017	Male	42	III	Yes	Yes	0	68.4
PT00312_T	Zhang et al. 2017	Male	43	III	Yes	Yes	0	64.7
PT00336_T	Zhang et al. 2017	Male	39	III	No	Yes	0	19.5667
PT00337_T	Zhang et al. 2017	Female	42	III	No	NA	0	64.0333
PT00341_T	Zhang et al. 2017	Male	41	III	Yes	Yes	0	28.8333
PT00344_T	Zhang et al. 2017	Male	43	III	No	NA	0	62.8
PT00388_T	Zhang et al. 2017	Male	38	III	Yes	Yes	0	12.2667
PT00391_T	Zhang et al. 2017	Female	33	III	Yes	NA	0	60.9667
PT00392_T	Zhang et al. 2017	Male	51	III	Yes	Yes	0	60.9667
PT00396_T	Zhang et al. 2017	Male	54	III	Yes	NA	1	25.7333
PT00406_T	Zhang et al. 2017	Male	47	III	Yes	Yes	0	60.7333
PT00422_T	Zhang et al. 2017	Female	28	III	Yes	Yes	0	59.2333
PT00431_T	Zhang et al. 2017	Male	63	III	Yes	NA	0	59.2
PT00437_T	Zhang et al. 2017	Male	66	III	Yes	Yes	0	22.4
PT00438_T	Zhang et al. 2017	Male	49	III	Yes	Yes	0	59.8
PT00439_T	Zhang et al. 2017	Male	47	III	Yes	NA	0	58.6
PT00445_T	Zhang et al. 2017	Male	64	III	Yes	Yes	0	13.0667
PT00450_T	Zhang et al. 2017	Male	17	III	No	Yes	0	9.43333
PT00452_T	Zhang et al. 2017	Female	49	III	Yes	Yes	1	21.4
